# Supplementary material for: Years of life lost due to cancer in the United Kingdom from 1988 to 2017
Source: PubMed Central journal article supplement (PMC10645733; doi:10.1038/s41416-023-02422-8), 2023-09-19

# C15: Oesophagus

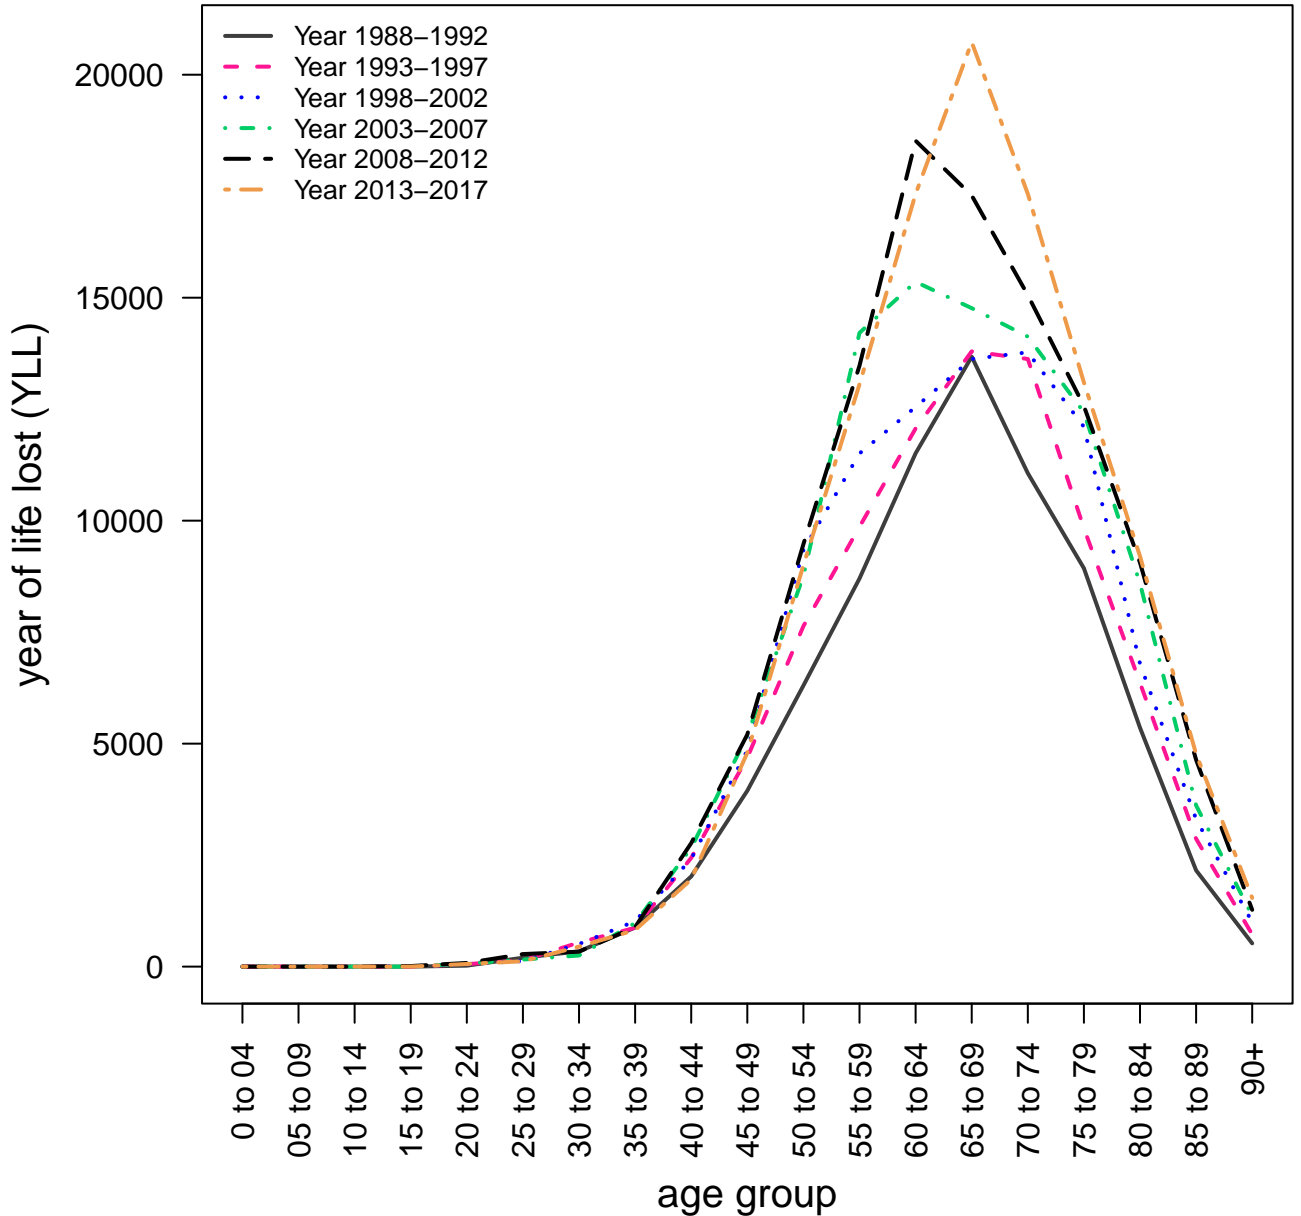

# C16: Stomach

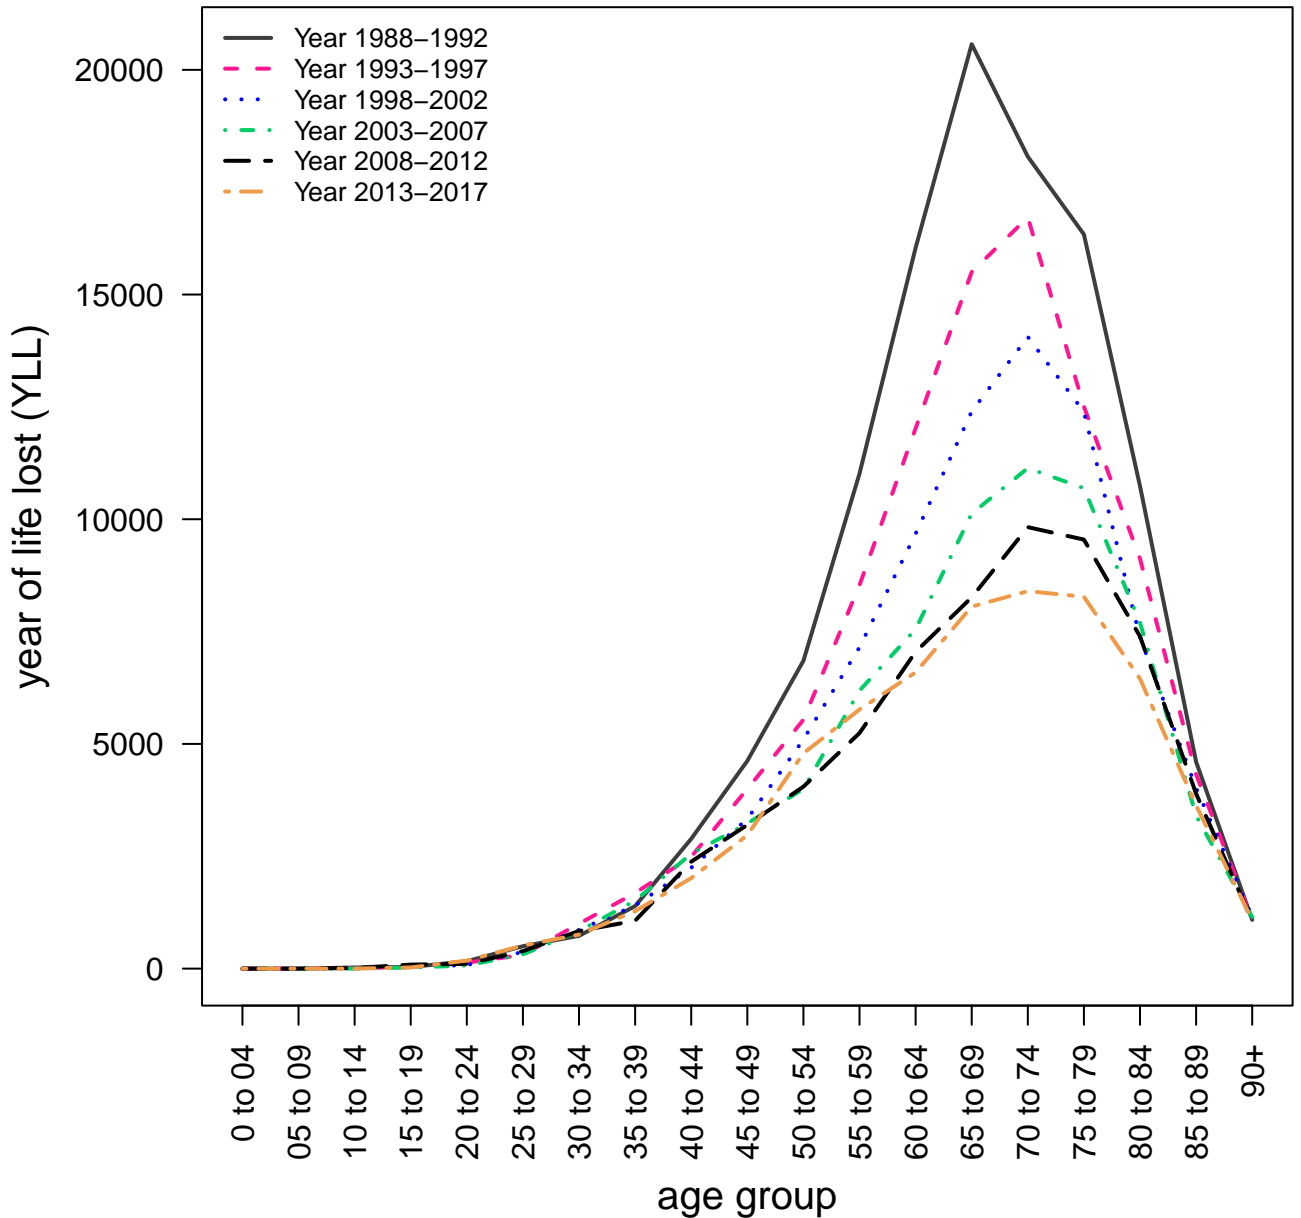

# C18-C20: Bowel

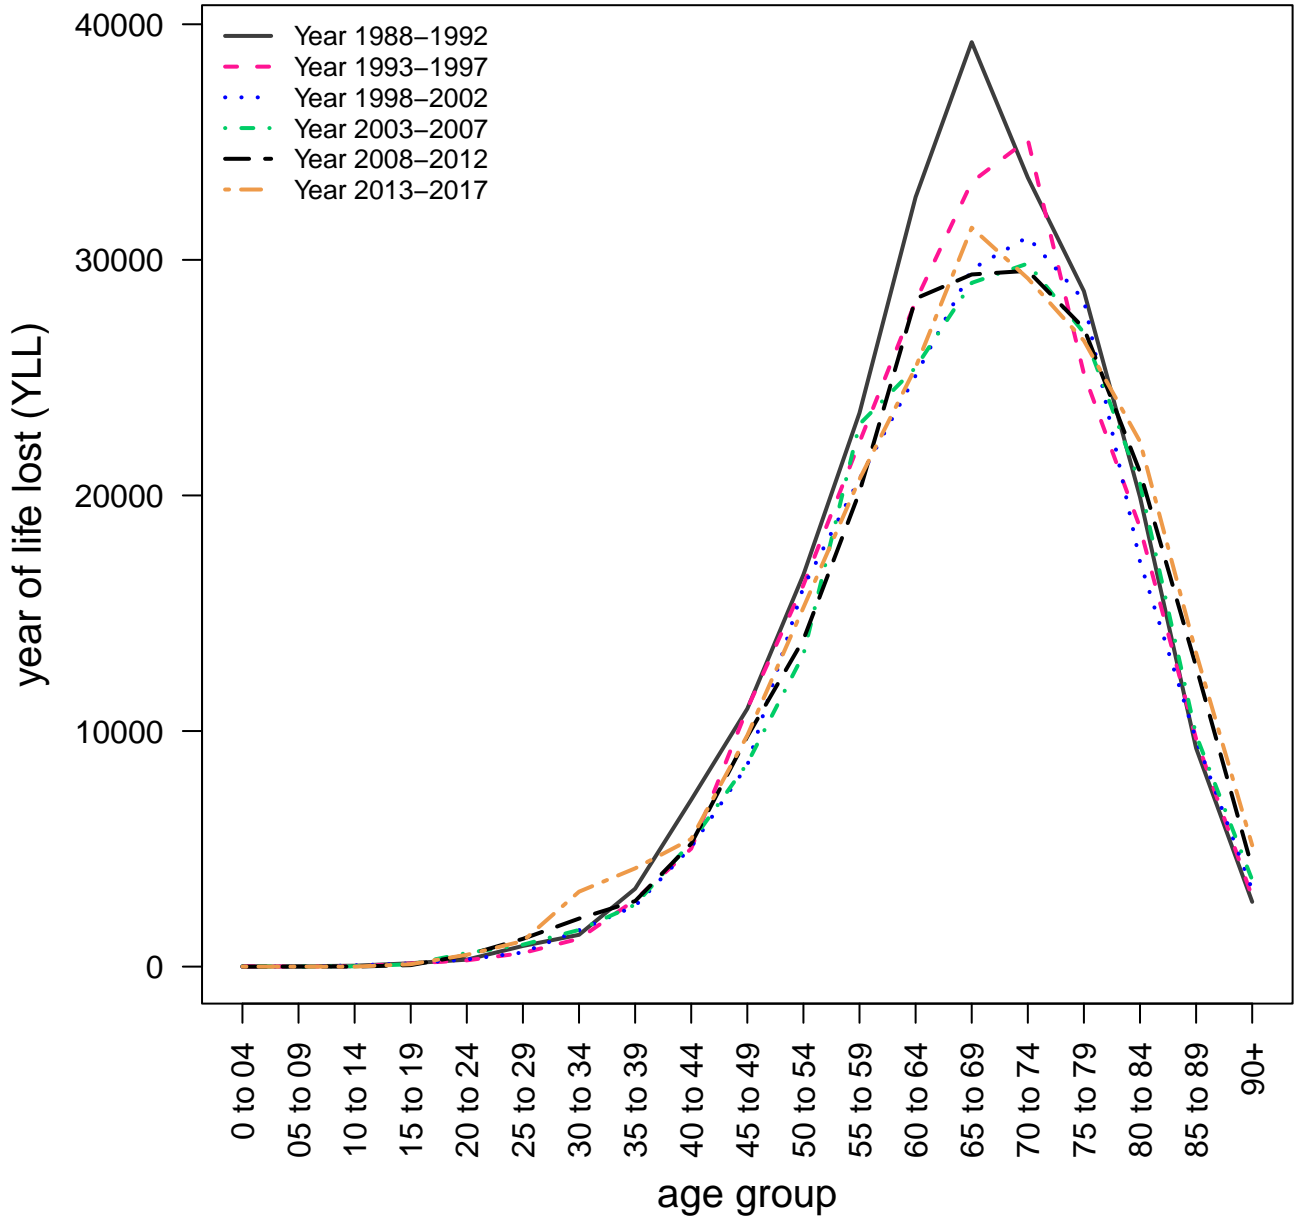

## C22: Liver

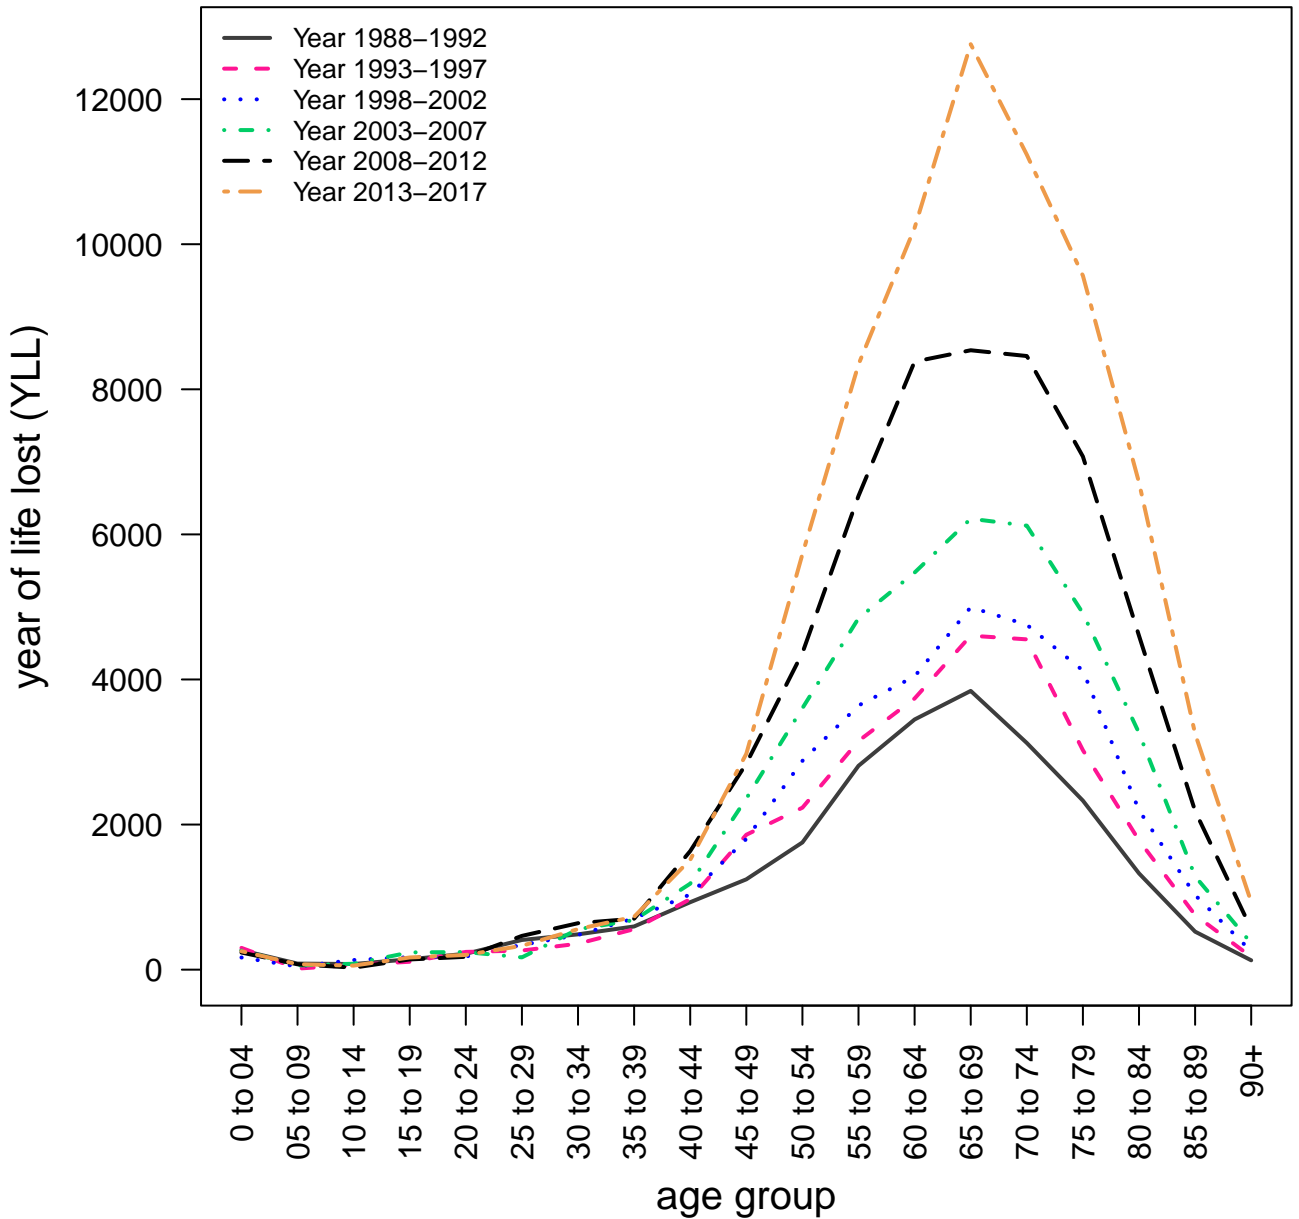

## C25: Pancreas

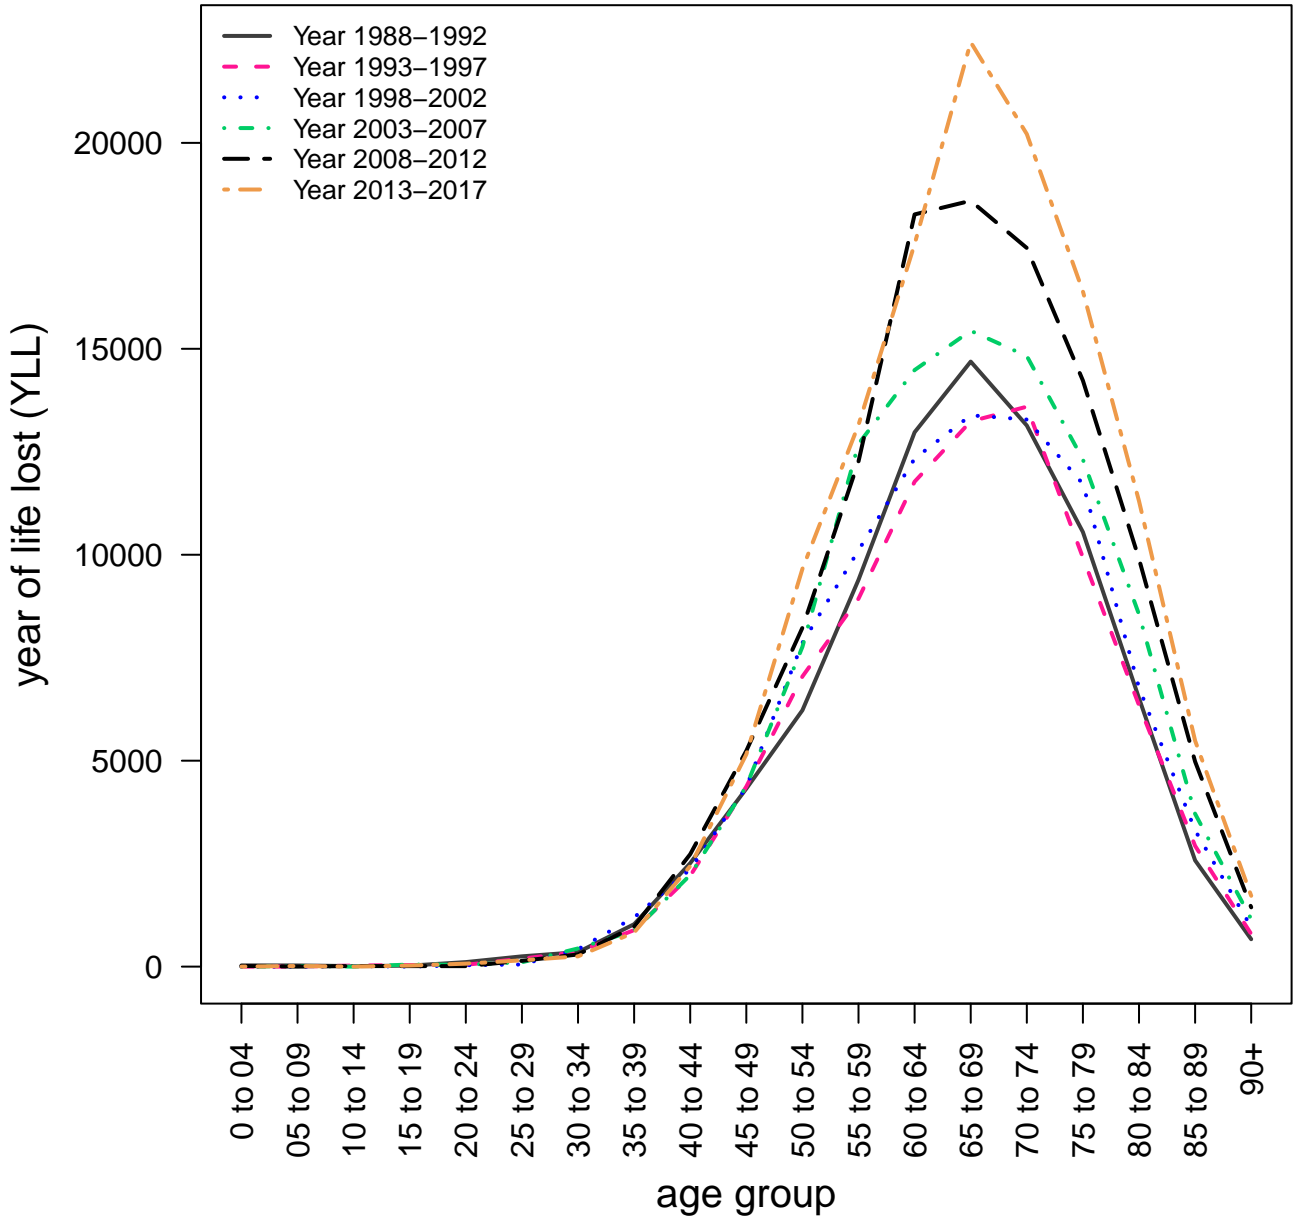

# C33-C34: Lung

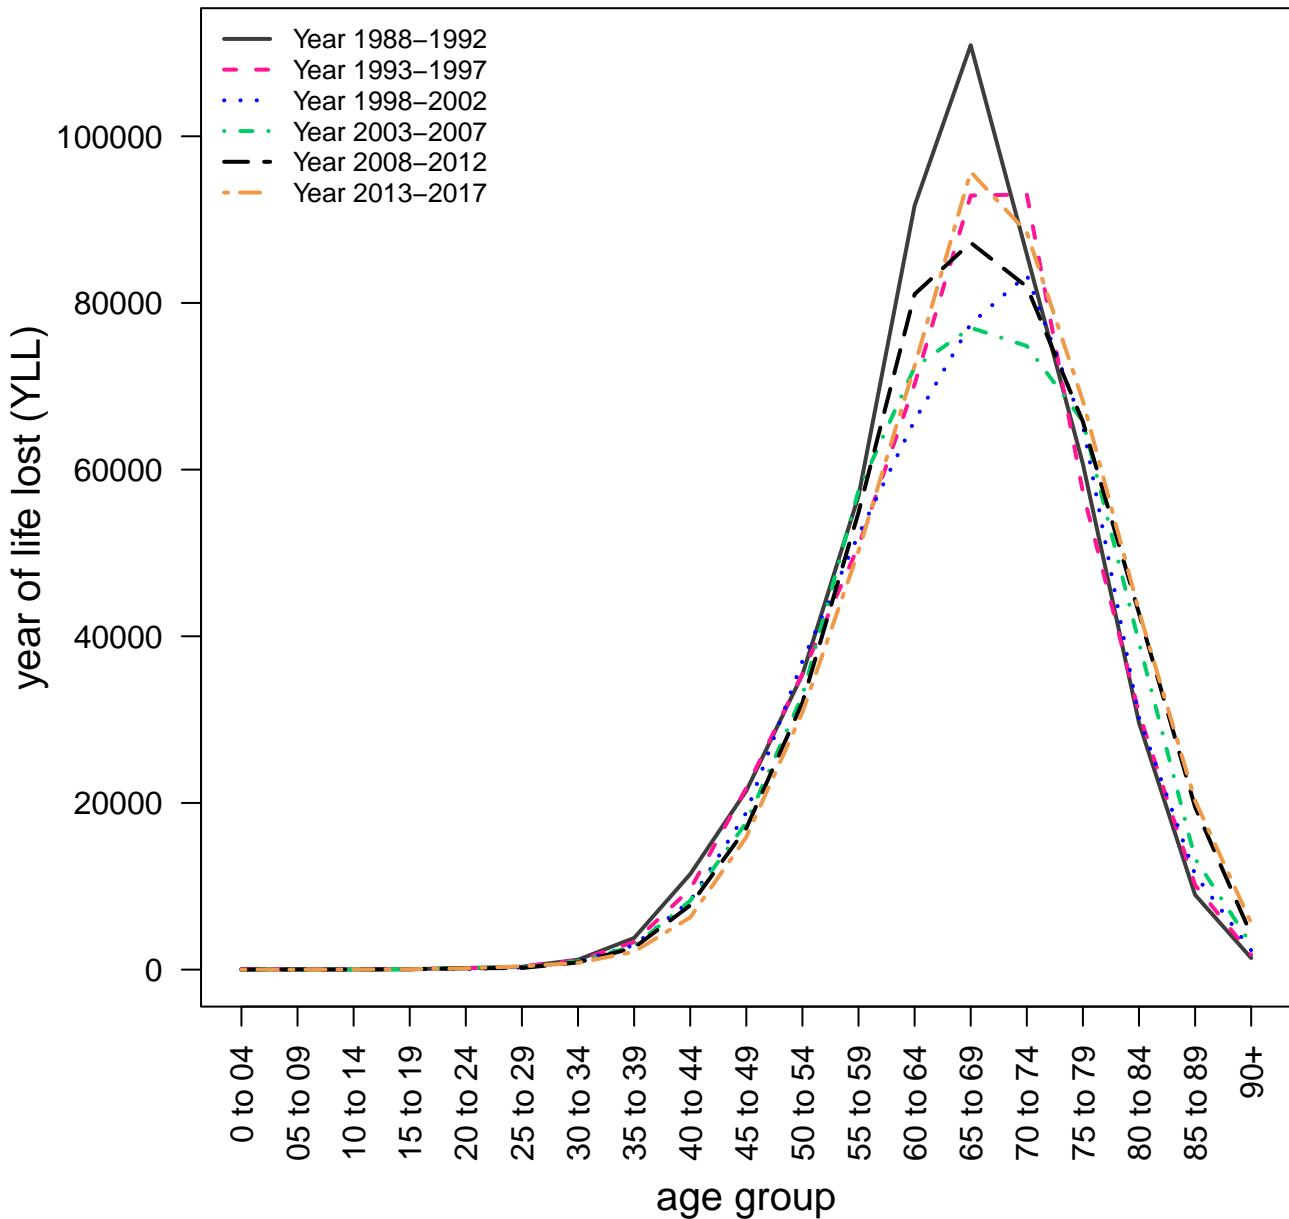

# C43: Melanoma Skin Cancer

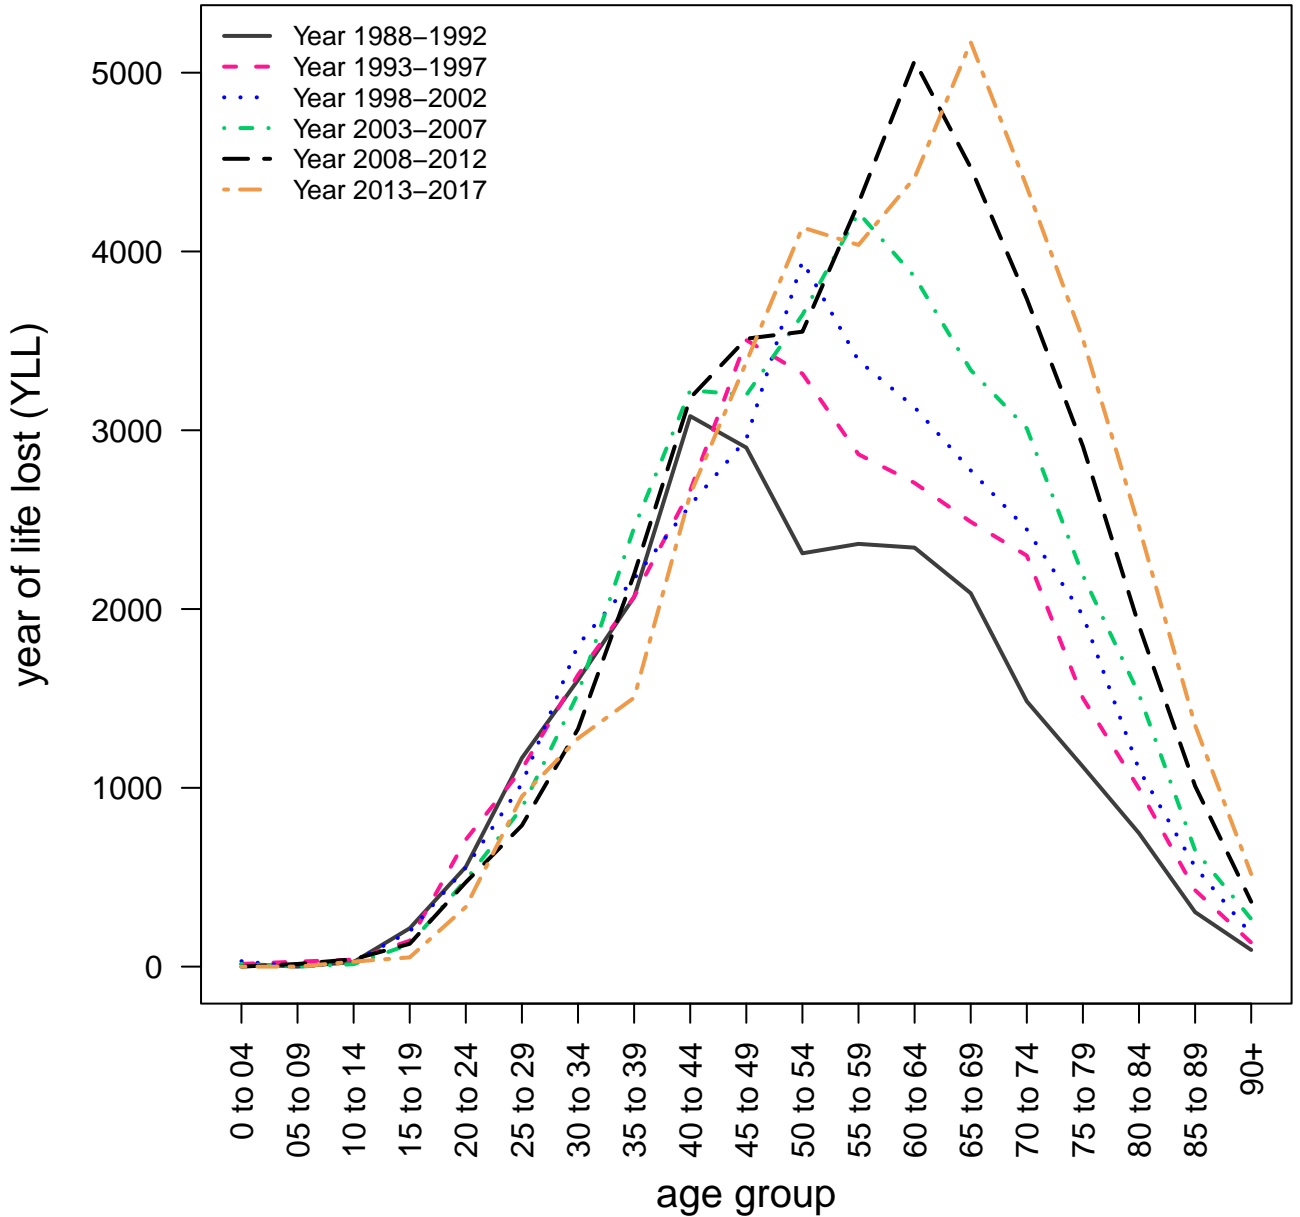

# C50: Breast

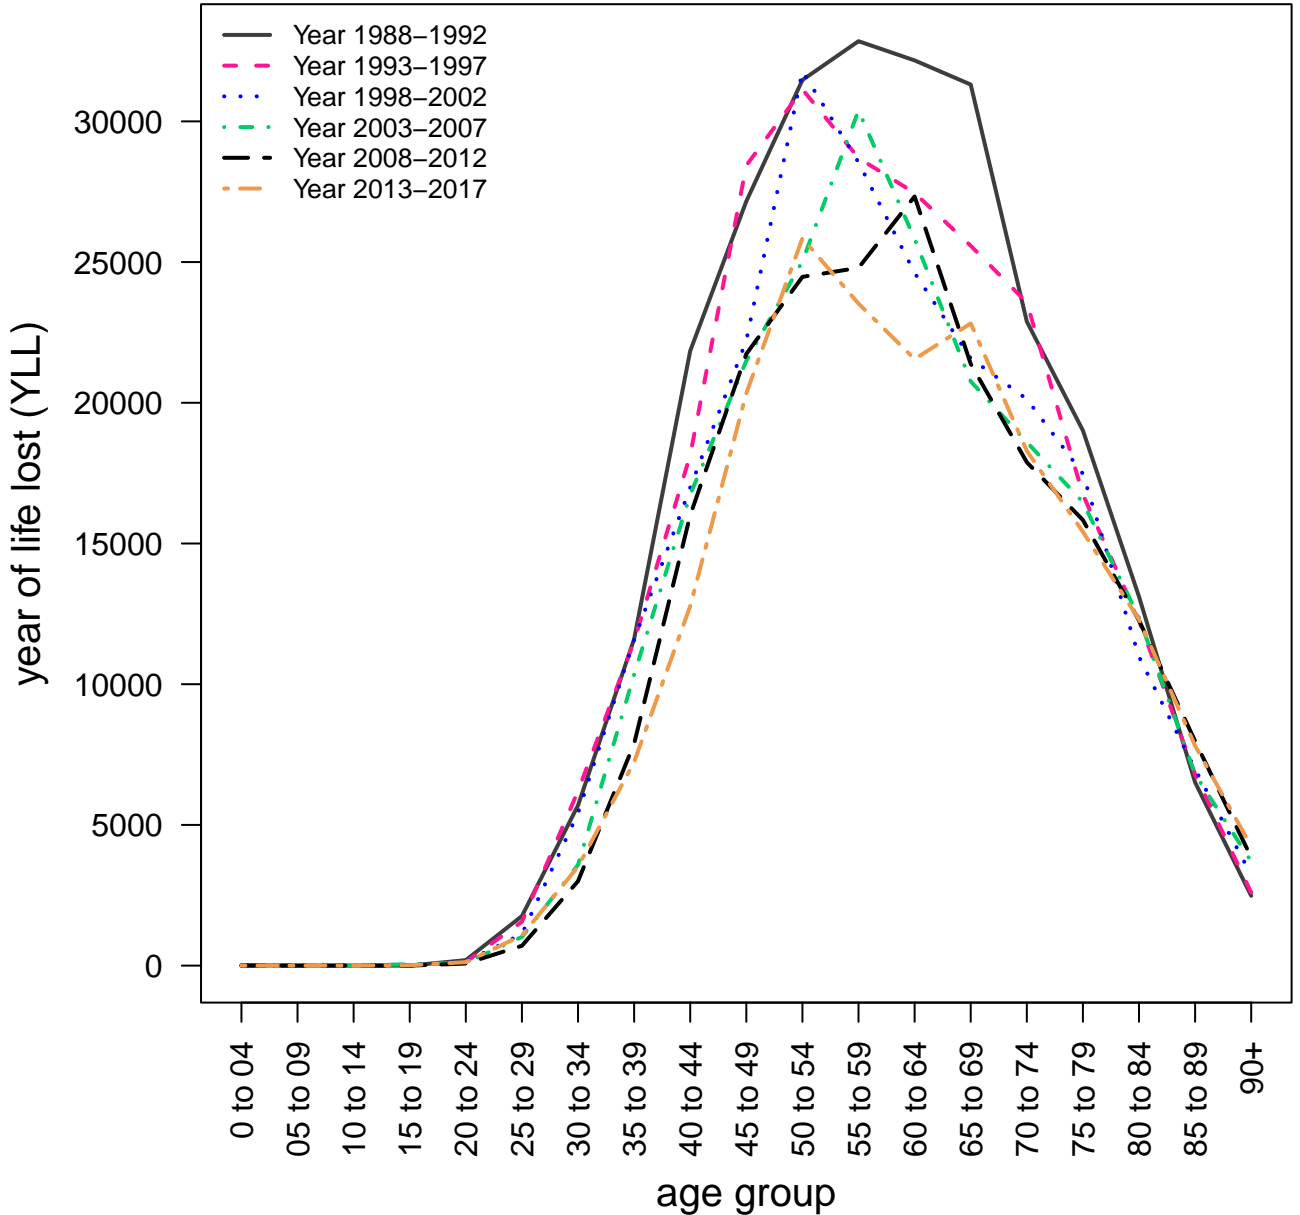



# C53: Cervix

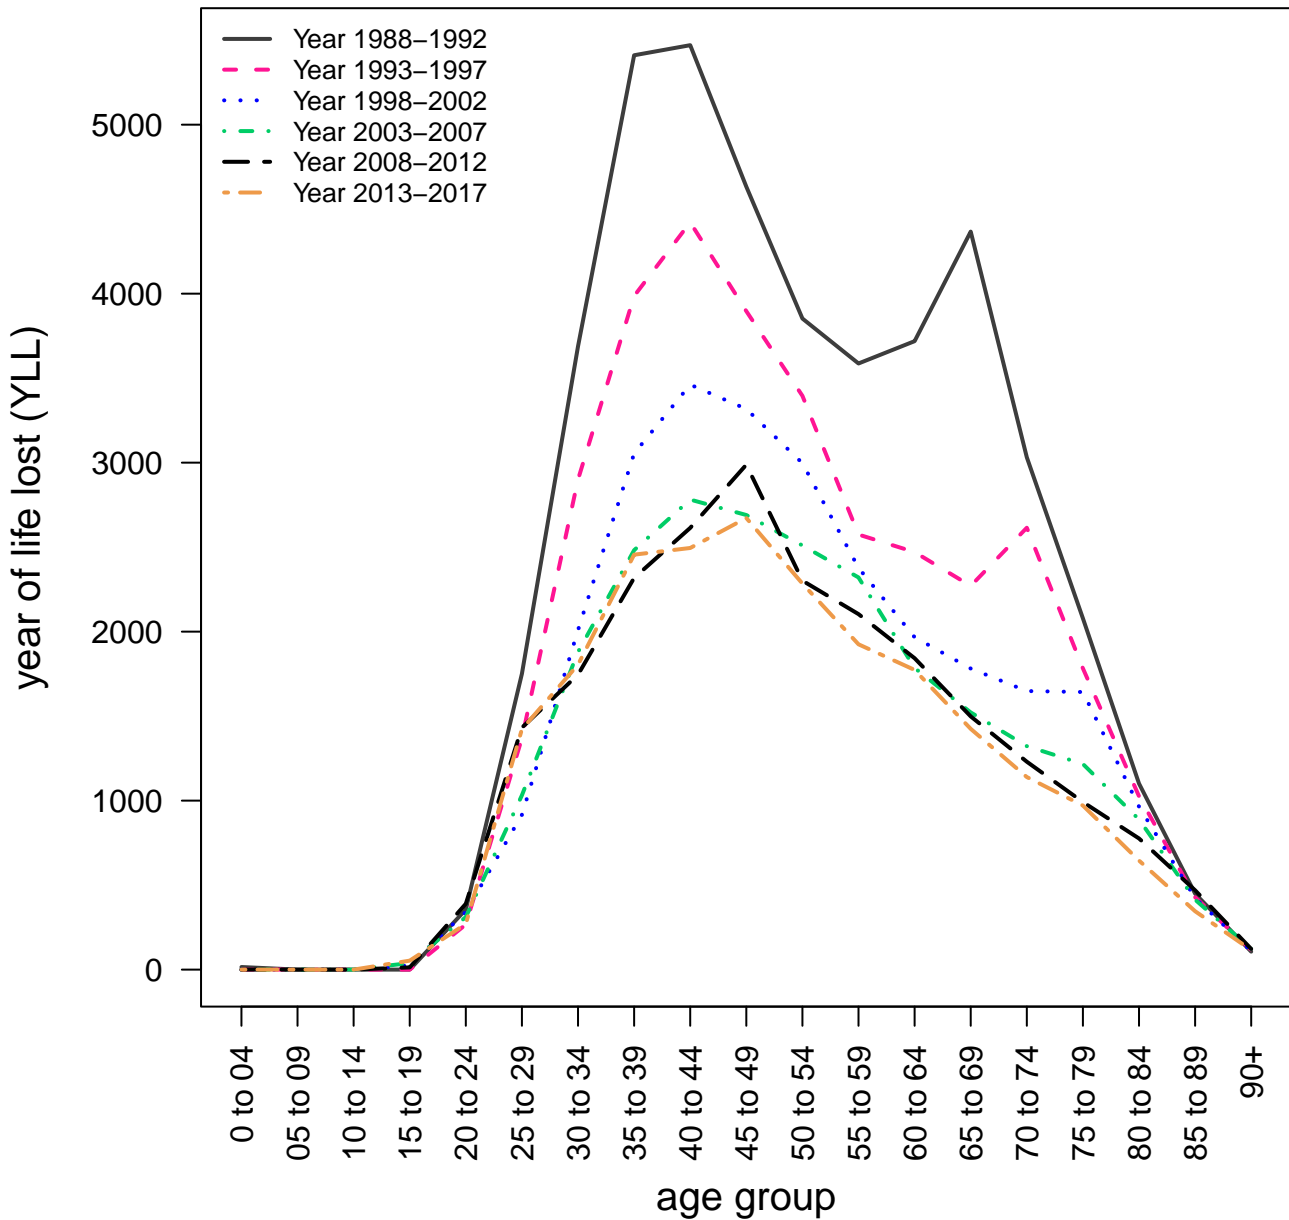

# C54-C55: Uterus

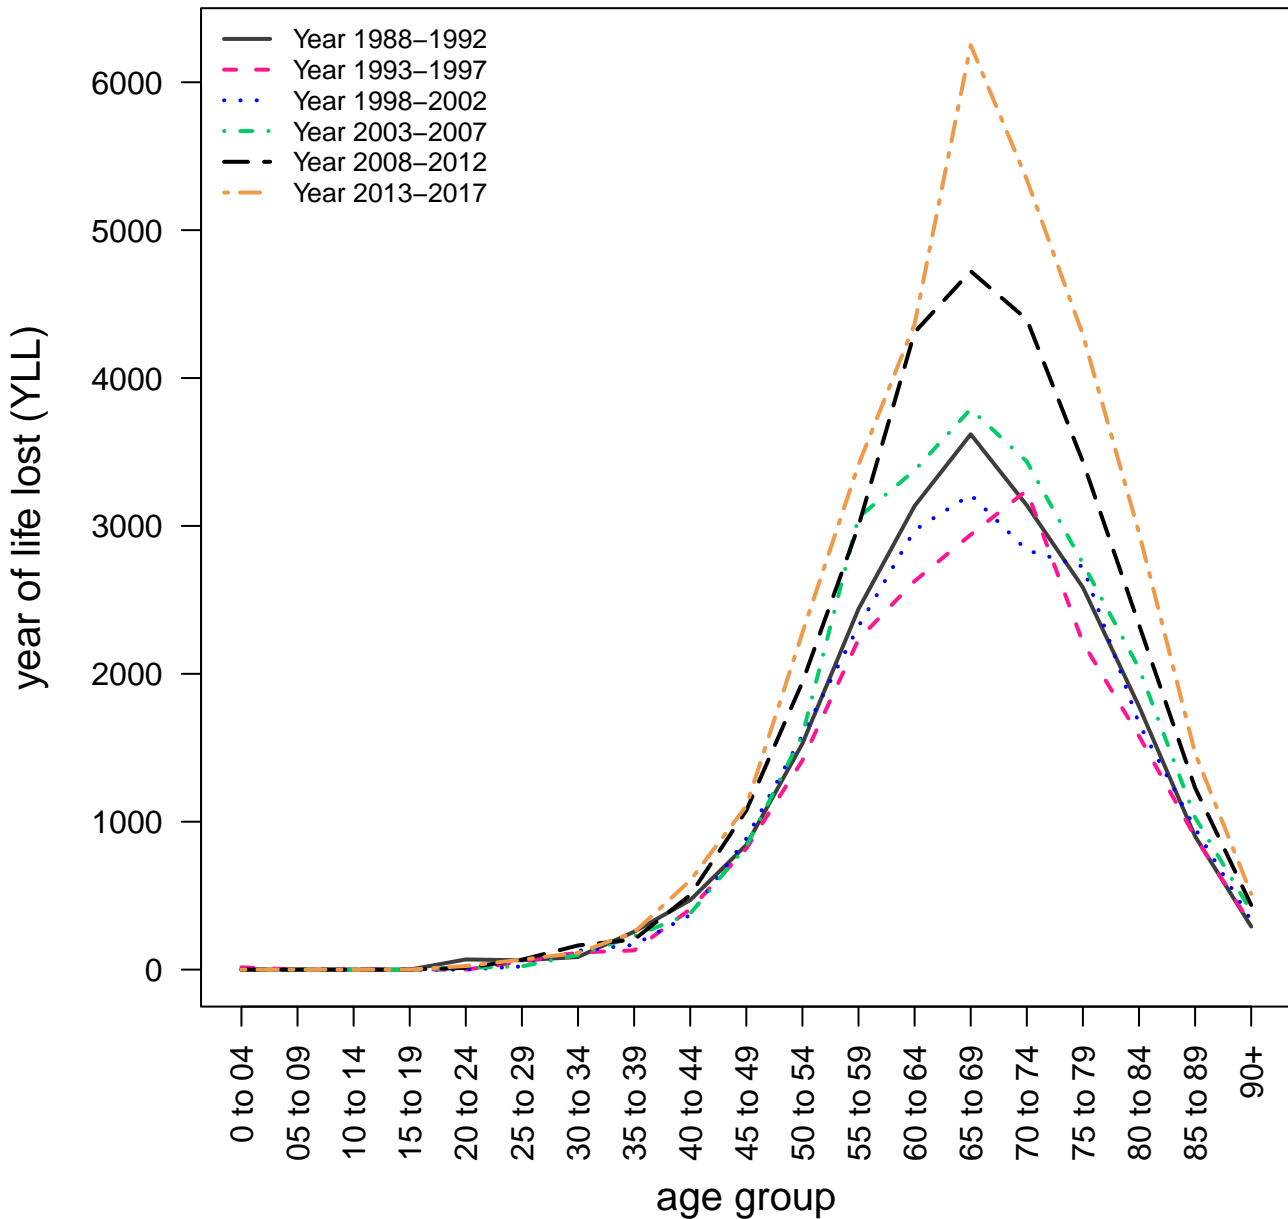

# C56-C57.4: Ovary

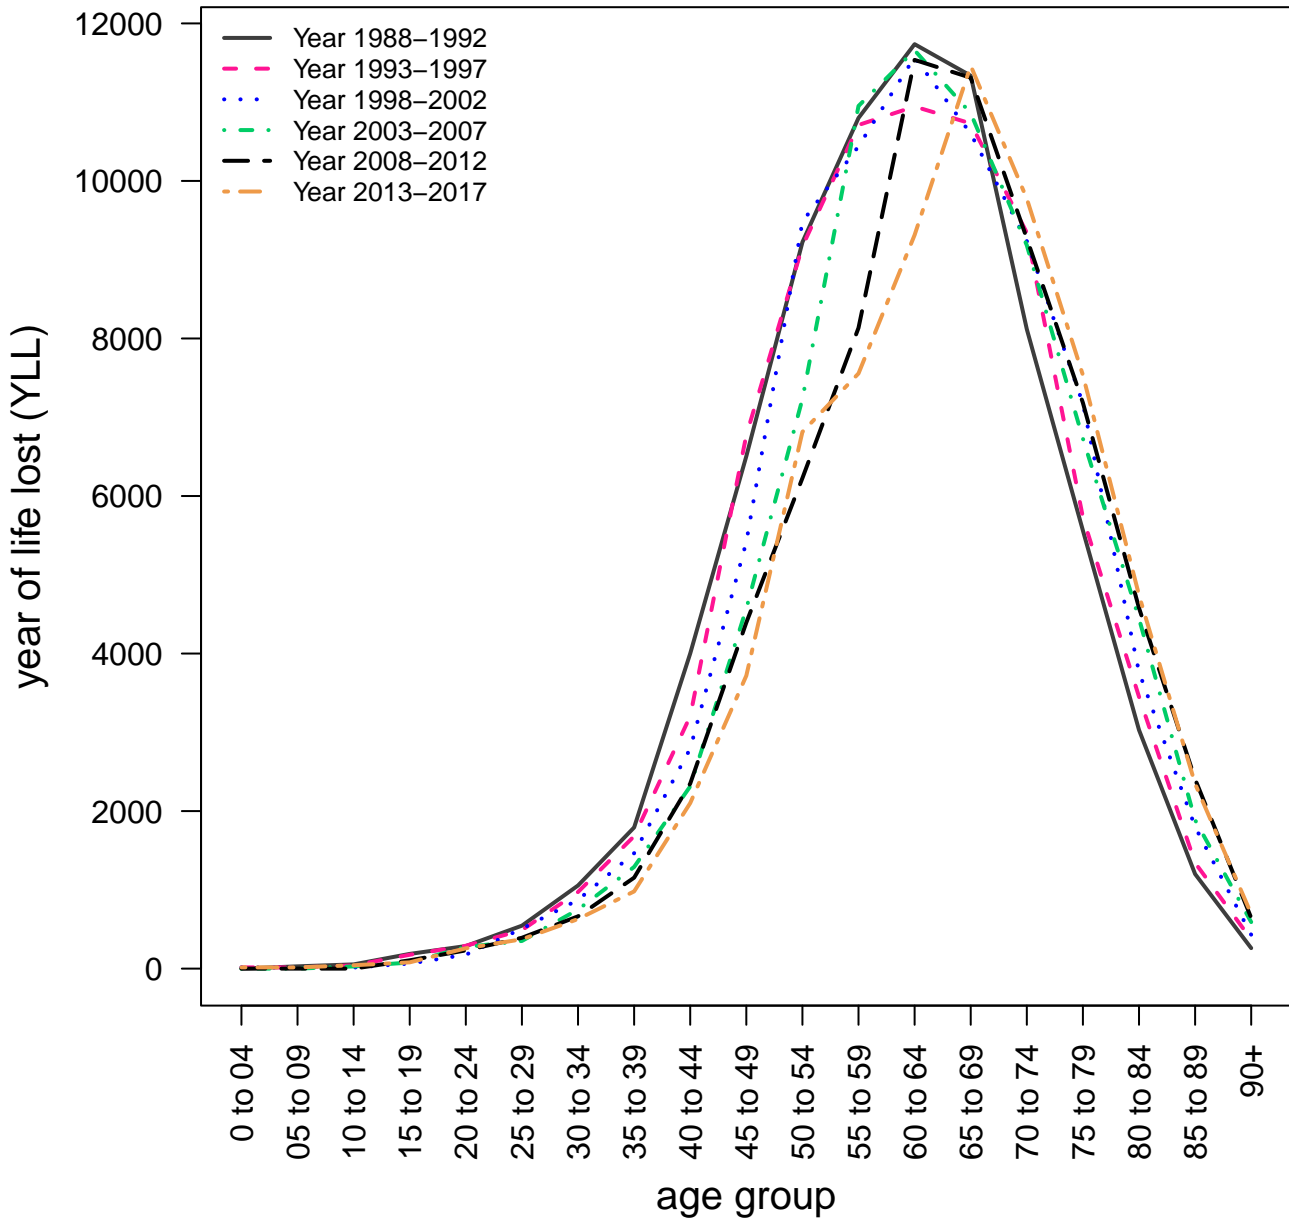

# C61: Prostate

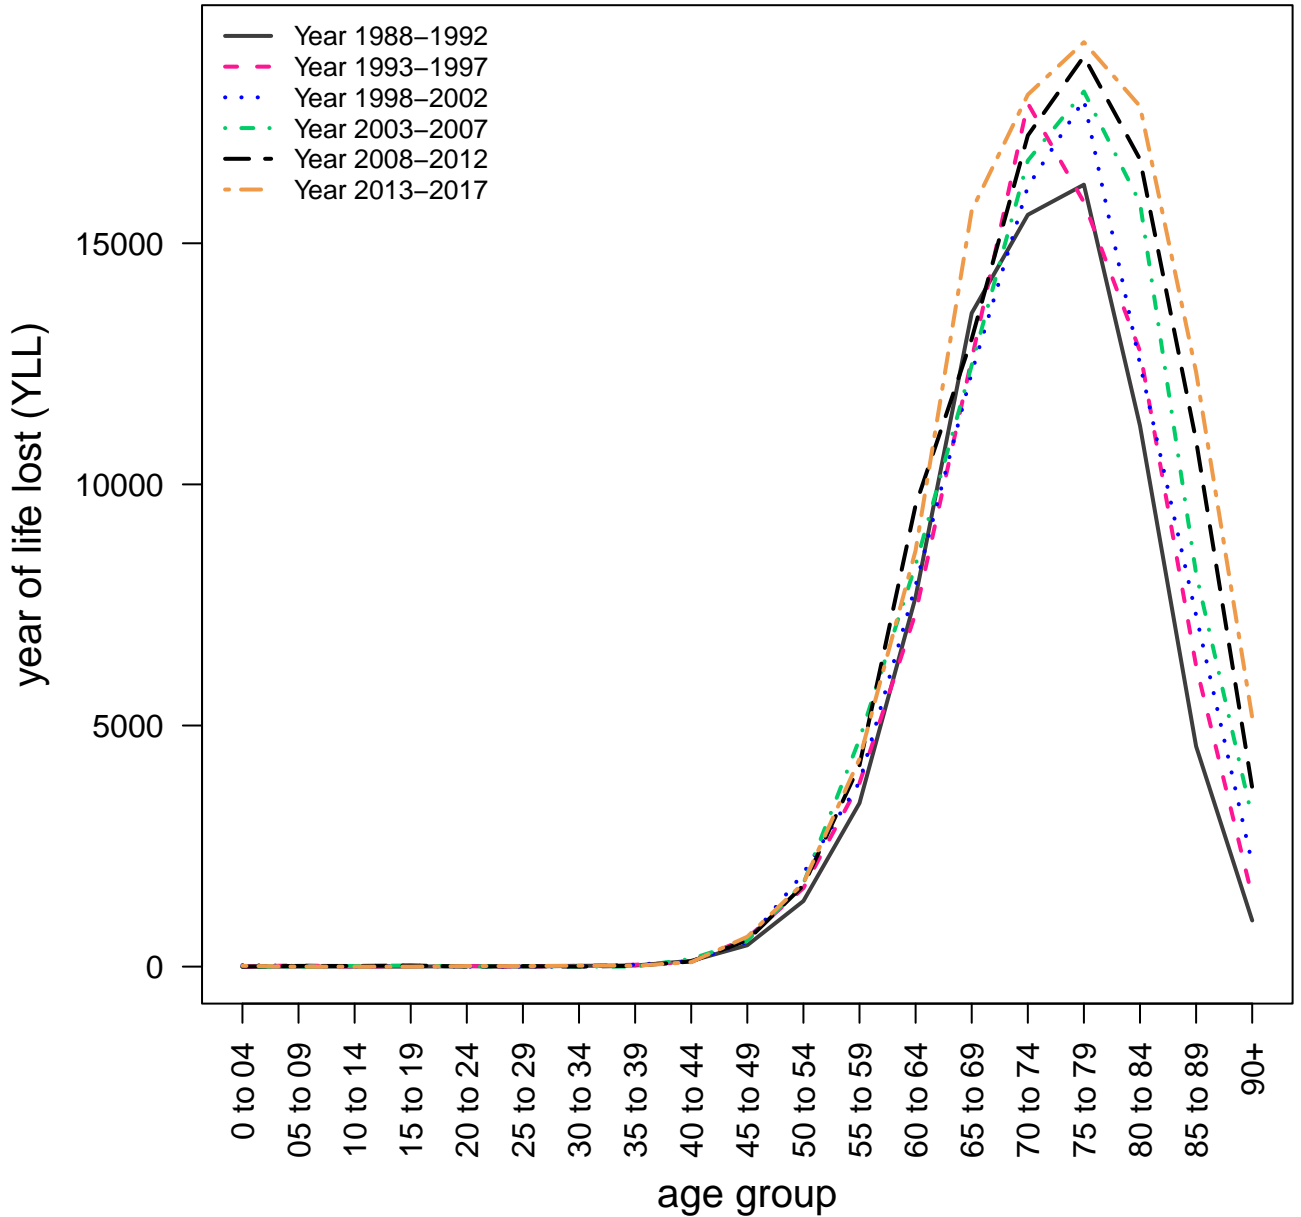

# C64-C66,C68: Kidney

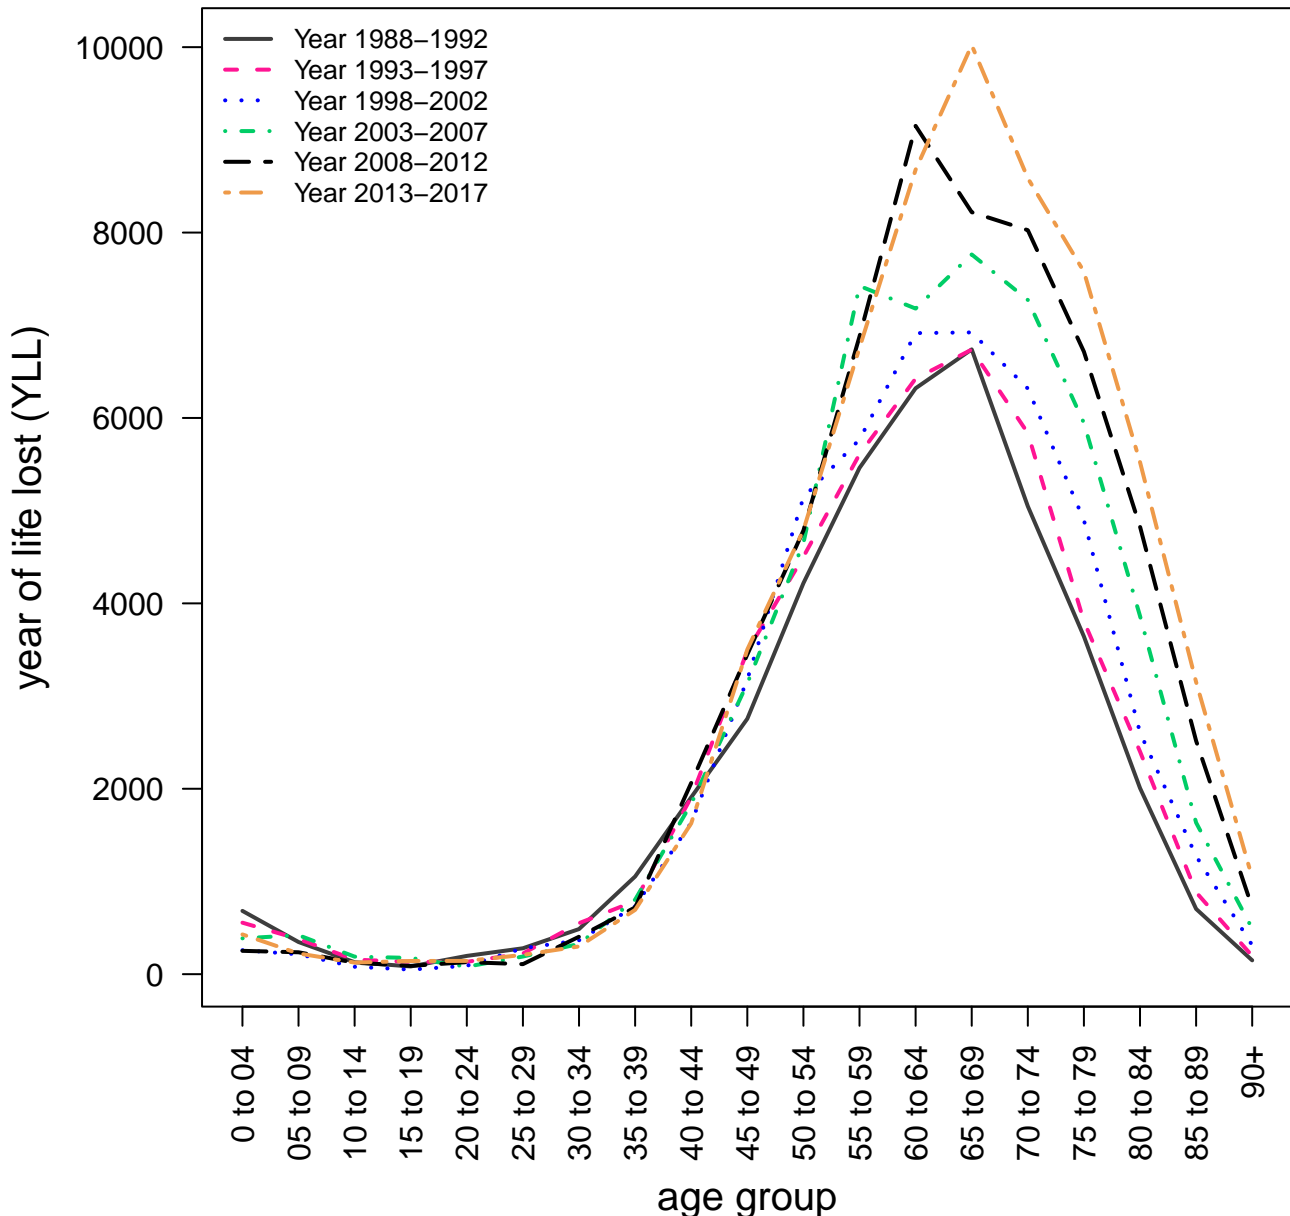

# C67: Bladder

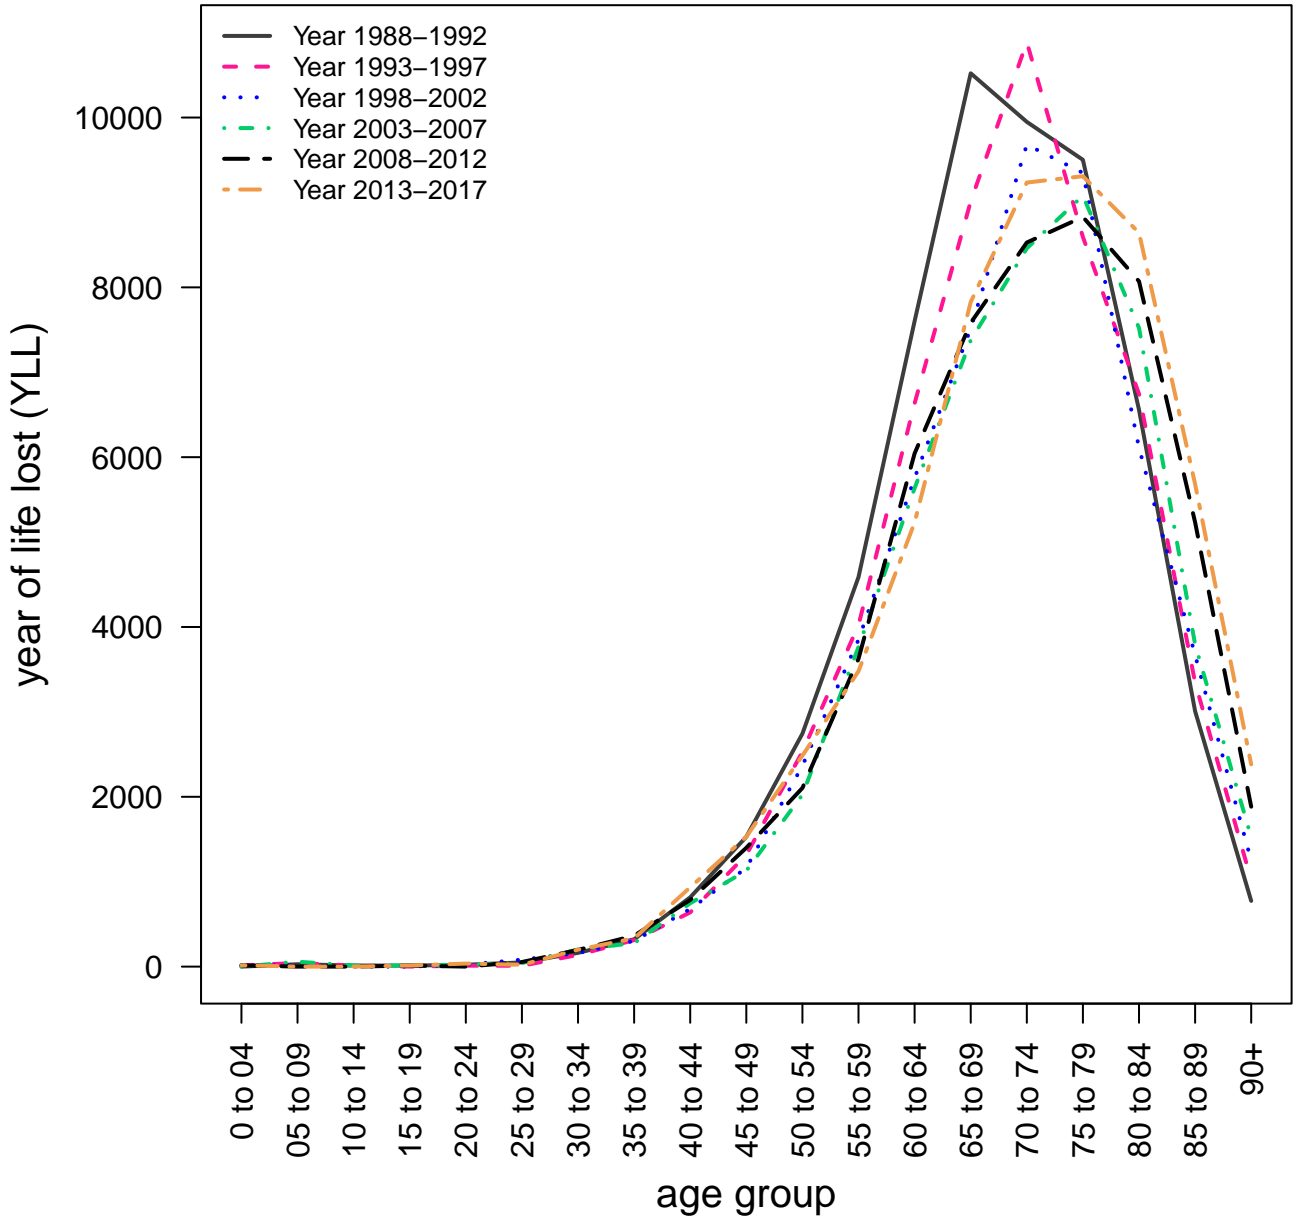

# C82-C86: Non-Hodgkin Lymphoma

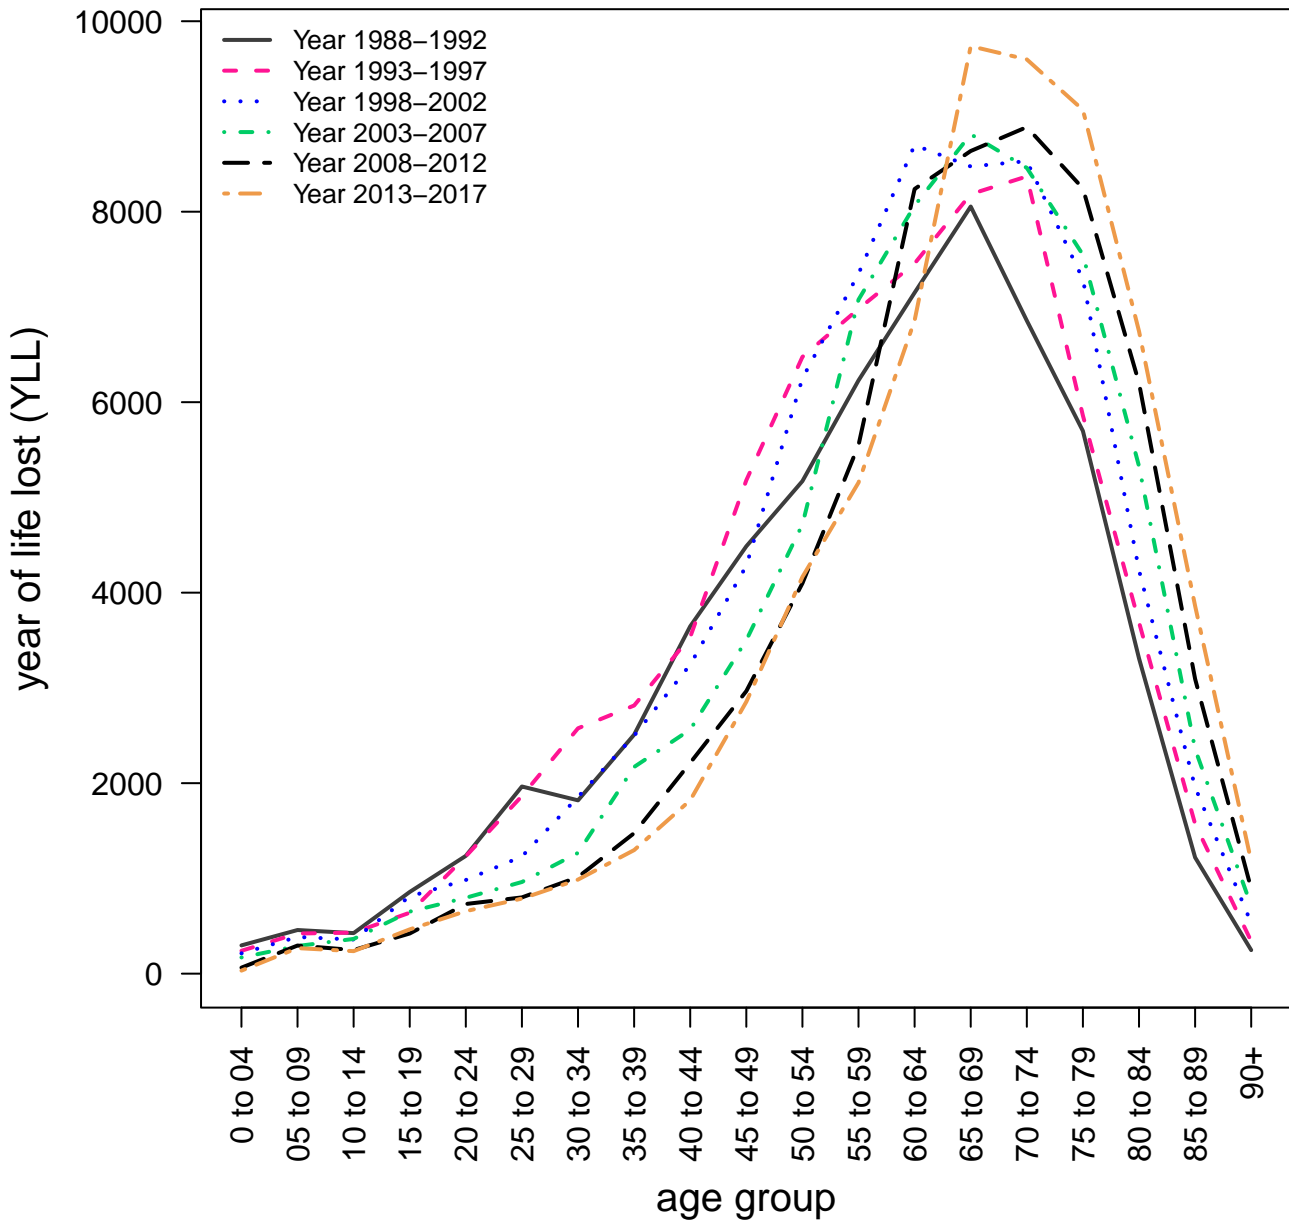

# C90: Myeloma

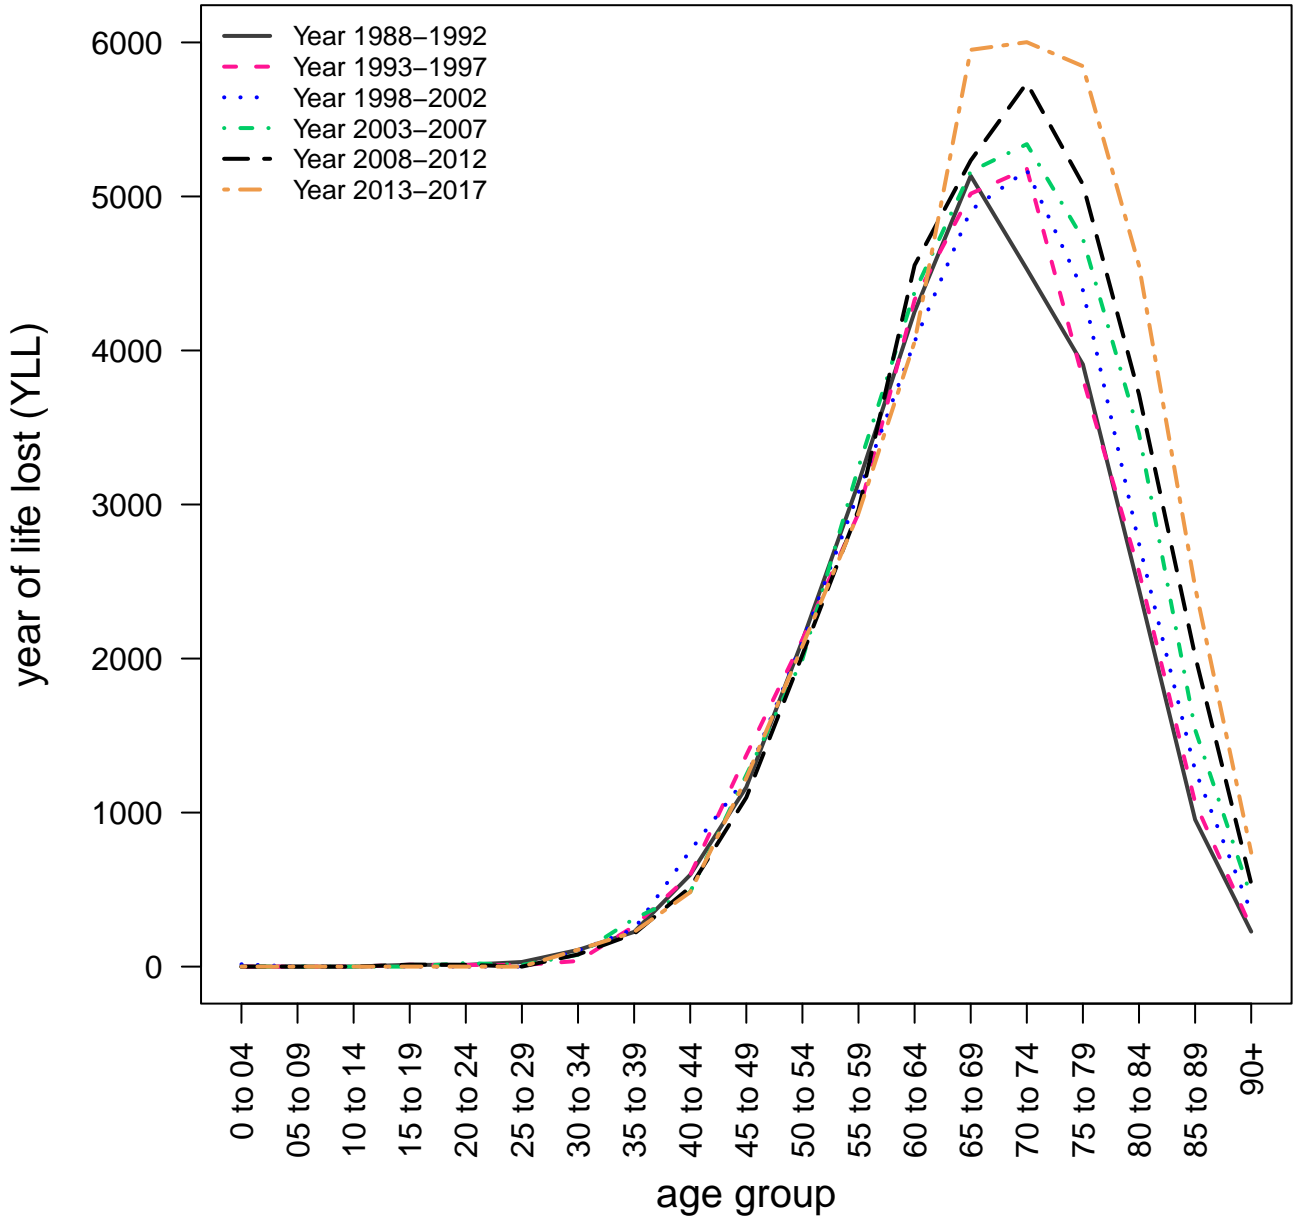



# C91-C95: Leukaemia

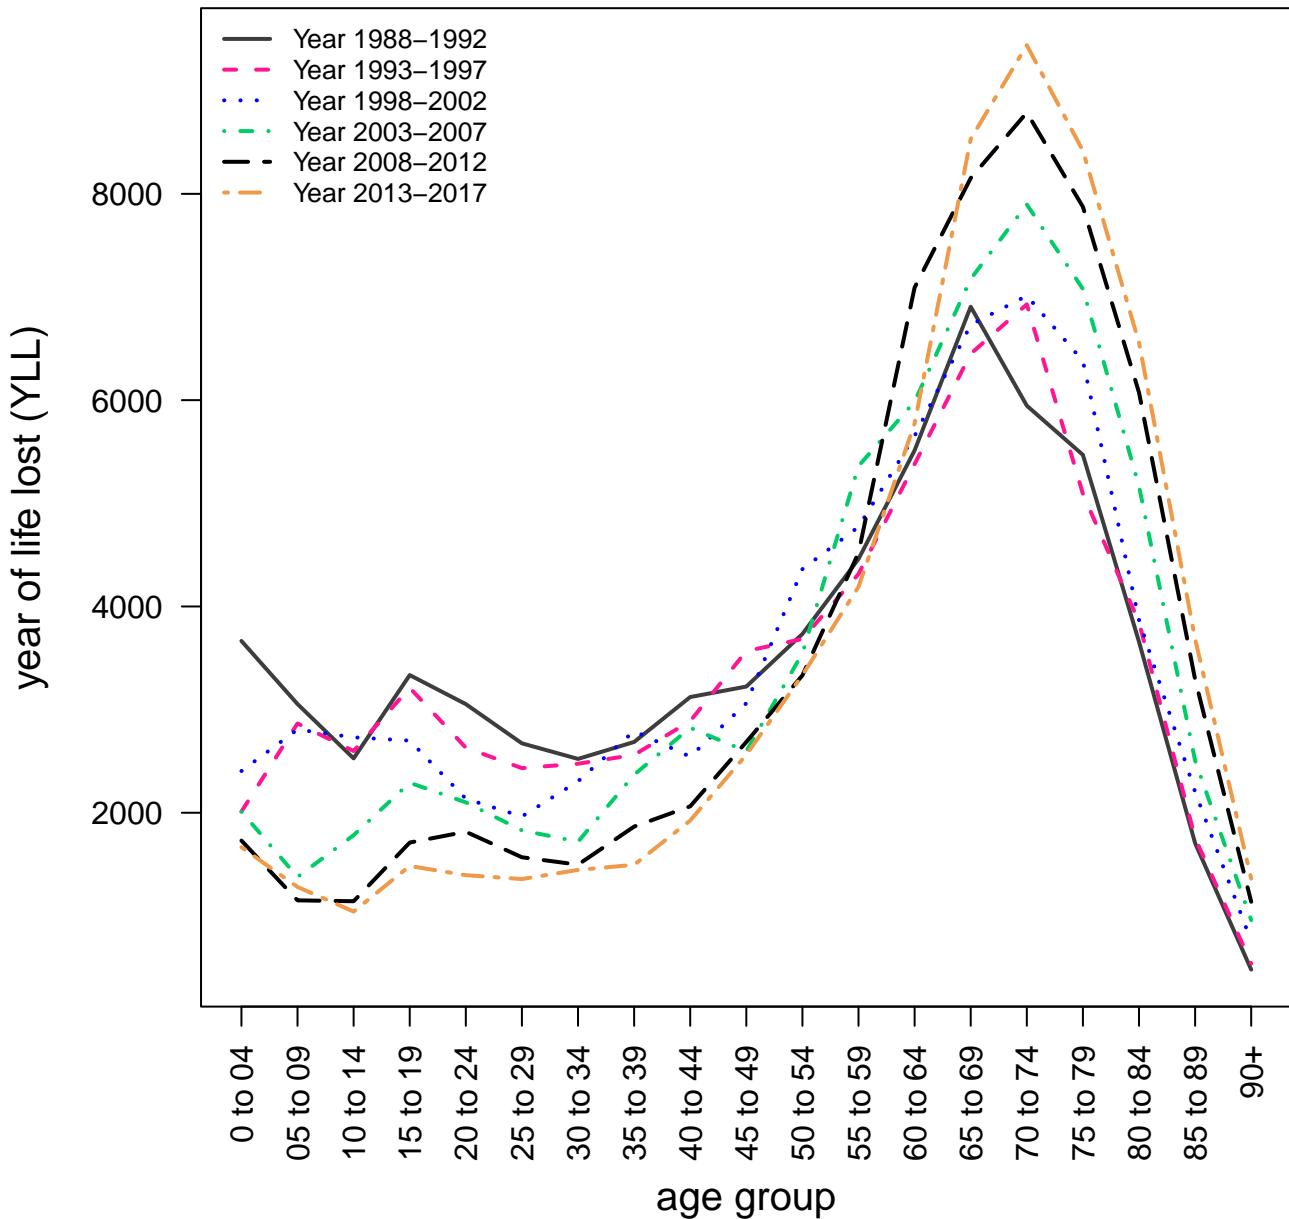

Supplement: 41416_2023_2422_MOESM2_ESM.pdf [file 41416_2023_2422_MOESM2_ESM.pdf]
